# Supplementary material for: Unveiling the promoting effect of water on formaldehyde oxidation over Pt/TiO2: insights from H/D kinetic isotope effect, in situ FTIR, and DFT
Source: Royal Society of Chemistry journal article supplement (doi:10.1039/d5en00541h), 2025-01-01
Supplement: d5en00541h1.pdf [file d5en00541h1.pdf]

## **Unveiling the promoting effect of water on formaldehyde oxidation over Pt/TiO<sub>2</sub>: insights from H/D kinetic isotope effect, *in situ* FTIR, and DFT**

Lu Wang <sup>a,b,c</sup>, Siyuan Zhang <sup>a,b</sup>, Jukun, Xiong <sup>a,b</sup>, Meicheng Wen <sup>a,b,\*</sup>

<sup>a</sup> *Guangdong Key Laboratory of Environmental Catalysis and Health Risk Control, Guangdong-Hong Kong-Macao Joint Laboratory for Contaminants Exposure and Health, Institute of Environmental Health and Pollution Control, Guangdong University of Technology, Guangzhou 510006, China.*

<sup>b</sup> *Guangdong Engineering Technology Research Center for Photocatalytic Technology Integration and Equipment, Guangdong Basic Research Center of Excellence for Ecological Security and Green Development Guangzhou, School of Environmental Science and Engineering, Guangdong University of Technology, Guangzhou 510006, China.*

<sup>c</sup> *School of Biology and Food Engineering, Guangdong University of Education, Guangzhou 510303, China.*

\* Corresponding author. E-mail address: meicheng.wen@gdut.edu.cn

**Table S1.** Detailed technical parameters during KIE experiment.

| Formaldehyde                              | F1 flow (mL min <sup>-1</sup> ) | Water            | F2/F3 flow (mL min <sup>-1</sup> ) | RH (%) | Water bath temperature (°C) |
|-------------------------------------------|---------------------------------|------------------|------------------------------------|--------|-----------------------------|
| HCHO                                      | 40                              | -                | F2=0                               | 0      | -                           |
| HCHO                                      | 40                              | H <sub>2</sub> O | F3=30                              | 10     | 4                           |
| HCHO                                      | 40                              | H <sub>2</sub> O | F3=30                              | 20     | 10                          |
| HCHO                                      | 40                              | H <sub>2</sub> O | F3=30                              | 40     | 35                          |
| HCHO                                      | 40                              | H <sub>2</sub> O | F3=30                              | 50     | 40                          |
| 1.5 mL DCDO (20 wt % in D <sub>2</sub> O) | 40                              | H <sub>2</sub> O | F3=30                              | 40     | 35                          |
| HCHO                                      | 40                              | D <sub>2</sub> O | F3=30                              | 40     | 35                          |
| 1.5 mL DCDO (20 wt % in D <sub>2</sub> O) | 40                              | D <sub>2</sub> O | F3=30                              | 40     | 35                          |

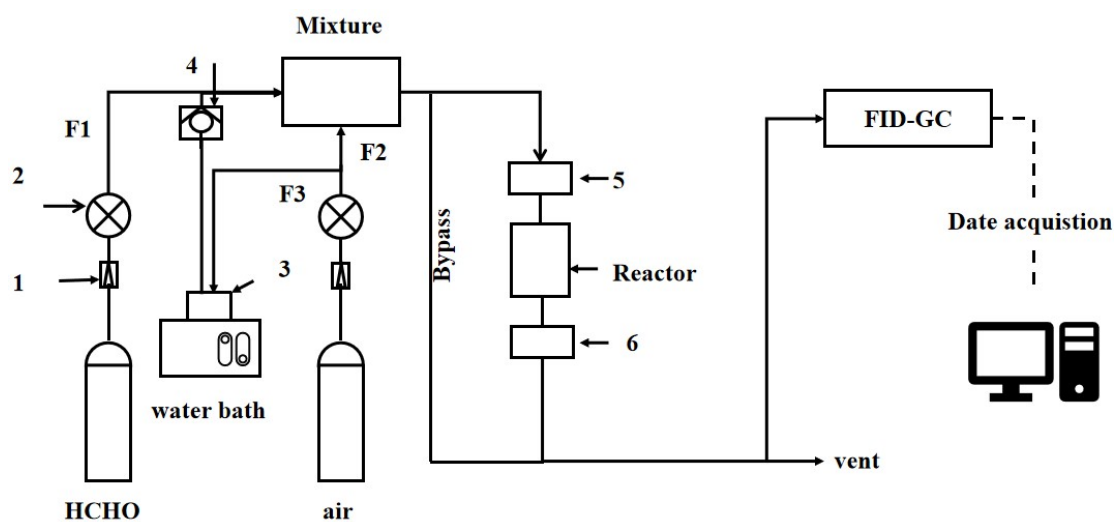

**Fig. S1.** Schematic diagram of the experimental setup: (1) Pressure gauge; (2) Mass flow controller; (3) Evaporation tank with water; (4) Check valve; (5) Relative humidity probe (in); (6) Relative humidity probe (out).

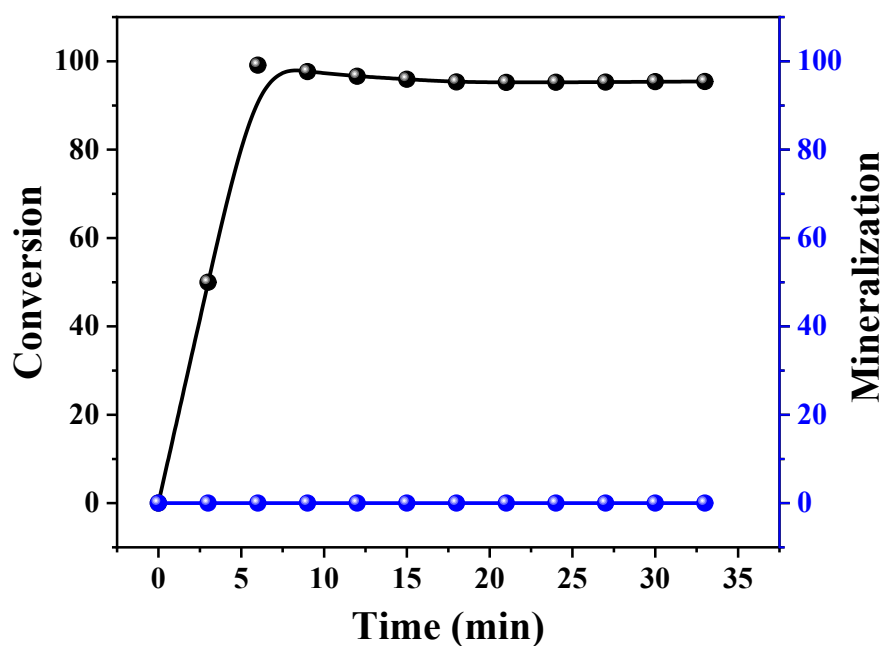

**Fig. S2.** HCHO conversion and mineralization over calcined Pt/TiO<sub>2</sub> GF catalyst under dry air.

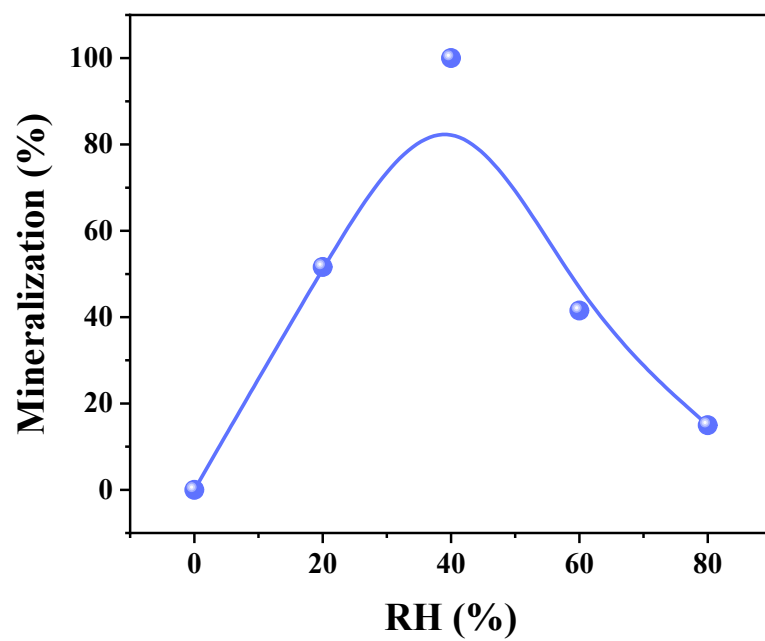

**Fig. S3.** Effect of relative humidity on HCHO mineralization over Pt/TiO<sub>2</sub> glass fiber.

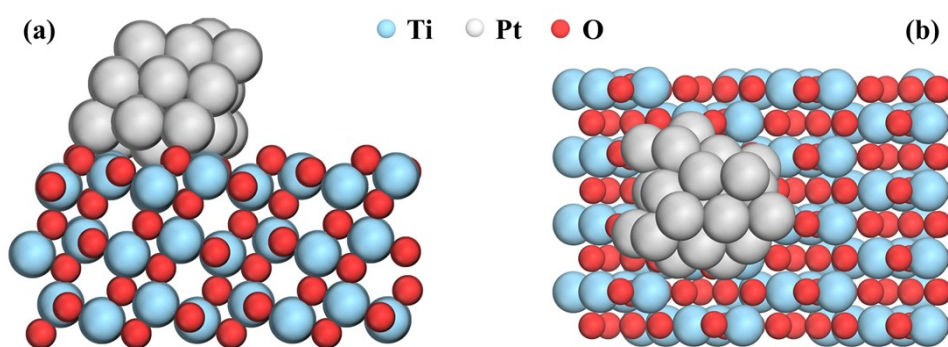

**Fig. S4.** Side view (a) and top view (b) of Pt/TiO<sub>2</sub> Structure.

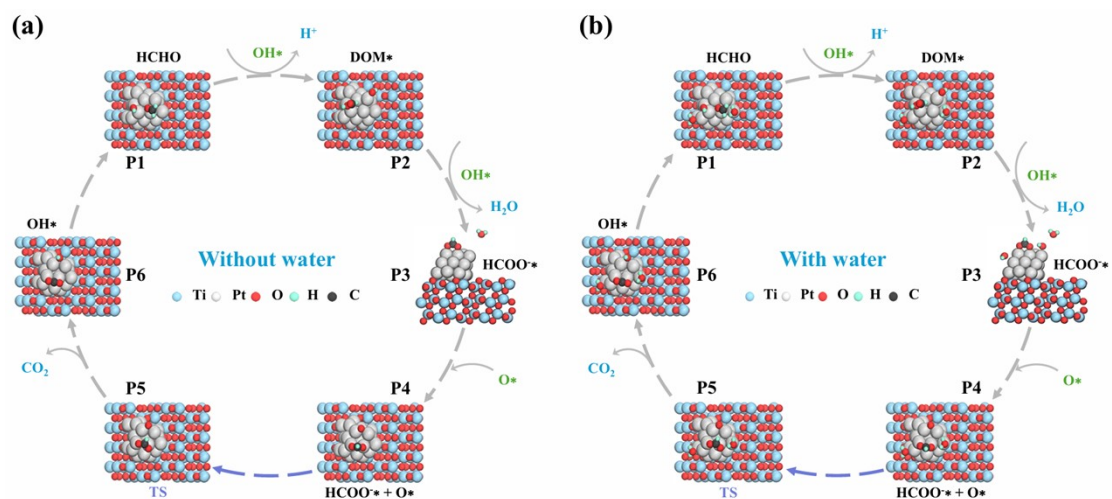

**Fig. S5.** Theoretical simulation of reaction pathway, transition states (TS), and intermediate states for HCHO oxidation on Pt/TiO<sub>2</sub>: (a) dry air conditions, (b) humid air conditions.
